# Supplementary material
Source: PubMed Central journal article supplement (PMC8982621)
Supplement: EMBJ-41-e110799-s001.pdf [file EMBJ-41-e110799-s001.pdf]

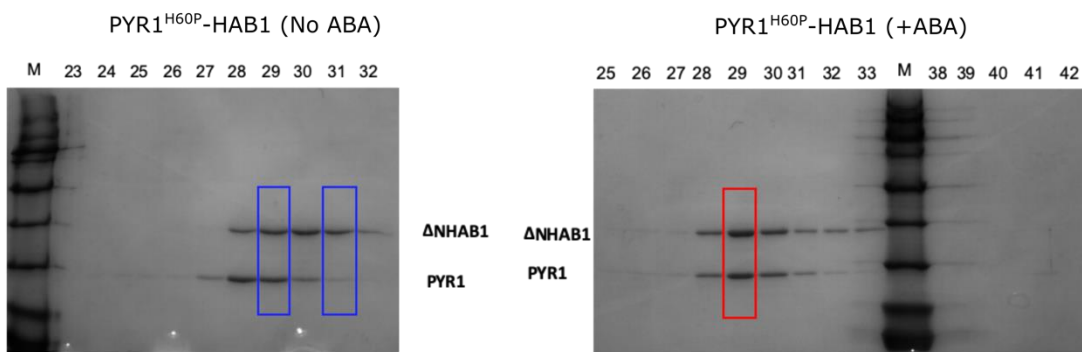

**SDS-PAGE analysis of the SEC-MALLS experiments in figure 3D:** In the presence of ABA (right panel) PYR1<sup>H60P</sup> and  $\Delta$ NHAB1 co-elute as a single peak, while in the absence of ABA (left panel) the first peak (Fraction 29) contains both PYR1<sup>H60P</sup> and  $\Delta$ NHAB1 while the second peak (Fraction 31) corresponds mostly to  $\Delta$ NHAB1. The blue boxes indicate the fractions corresponding to the first and second peaks in the MALLS experiment respectively, as shown in figure 3D. The red box corresponds to the single peak in the MALLS of Figure 3D (red trace).
